# Supplementary material for: Microplastic distribution and ecological risks: investigating road dust and stormwater runoff across land uses
Source: Royal Society of Chemistry journal article supplement (doi:10.1039/d3va00128h), 2023-11-13
Supplement: d3va00128h1.pdf [file d3va00128h1.pdf]

## Microplastic Distribution and Ecological Risks: Investigating Road Dust and Stormwater Runoff Across Land Uses

S. M. Alamgir Kabir<sup>a</sup>, Muhammed A Bhuiyan<sup>a</sup>, Guomin Zhang<sup>a</sup>, Biplob Kumar Pramanik<sup>a\*</sup>,

<sup>a</sup> *School of Engineering, RMIT University, GPO Box 2476, Melbourne VIC 3001, Australia*

*\*Corresponding Author: [biplob.pramanik@rmit.edu.au](mailto:biplob.pramanik@rmit.edu.au) RMIT University, School of Engineering, 124 La Trobe St, VIC 3000, Australia 3001, Tel: +61 3 9925 9419; Fax: +61 3 9639 0138*

**Table S1.** Road dust sample locations in industrial, commercial, and residential land uses.

| SI | Industrial zone             | SI | Residential zone      | SI | Commercial zone       |
|----|-----------------------------|----|-----------------------|----|-----------------------|
| 1  | Huntingdale Rd,             | 11 | Clayton Rd, Clayton   | 21 | Blackburn Rd,         |
| 2  | Ferntree Gully Rd, Ferntree | 12 | Cooke St, Clayton     | 22 | Carinish Rd, Oakleigh |
| 3  | Forster Rd, Mount           | 13 | Pinadle Ave, Woolamai | 23 | Springs Rd, Clayton   |
| 4  | Grieve Pde, Altona North    | 14 | Browns Rd,            | 24 | Rayhur St, Clayton    |
| 5  | Heidelberg Rd, Northcote    | 15 | Rowe St, Alphington   | 25 | Cheltenham Rd,        |
| 6  | Ballarat Rd, Deer Park      | 16 | Lonsdale St, East     | 26 | Middleborough Rd,     |
| 7  | Queen St, North Melbourne   | 17 | Fulton Rd, Blackburn  | 27 | Farnsworth Ave,       |
| 8  | Butler Rd, Altona North     | 18 | Heaths Rd, Hoppers    | 28 | Moore St, Southbank   |
| 9  | Aberdeen Rd, Prahran        | 19 | Copeton Ave, Tarneit  | 29 | Manning Cct, Tarneit  |
| 10 | Dohertys Rd, Laverton       | 20 | College Rd, Werribee  | 30 | Burns Rd, Altona      |

**Table S2.** Stormwater sample locations in wetlands of industrial, commercial, and residential land uses.

| <b>SI</b> | <b>Industrial zone</b>      | <b>SI</b> | <b>Residential zone</b> | <b>SI</b> | <b>Commercial zone</b> |
|-----------|-----------------------------|-----------|-------------------------|-----------|------------------------|
| 1         | Huntingdale Wetland,        | 6         | Namatjira Reserve,      | 11        | Keeley Park, Clayton   |
| 2         | Mulgrave Reserve,           | 7         | Talbot Park, Oakleigh   | 12        | Alphington Wetlands,   |
| 3         | Yarra River, <i>Central</i> | 8         | Holmesglen Reserve,     | 13        | Gardiners Creek, Box   |
| 4         | Maribyrnong River,          | 9         | Wilson Reserve, Ivanhoe | 14        | Edgewater Wetland,     |
| 5         | Frogs Hollow Wetland,       | 10        | Wurundjeri Wetland,     | 15        | Lysterfiled Lake,      |

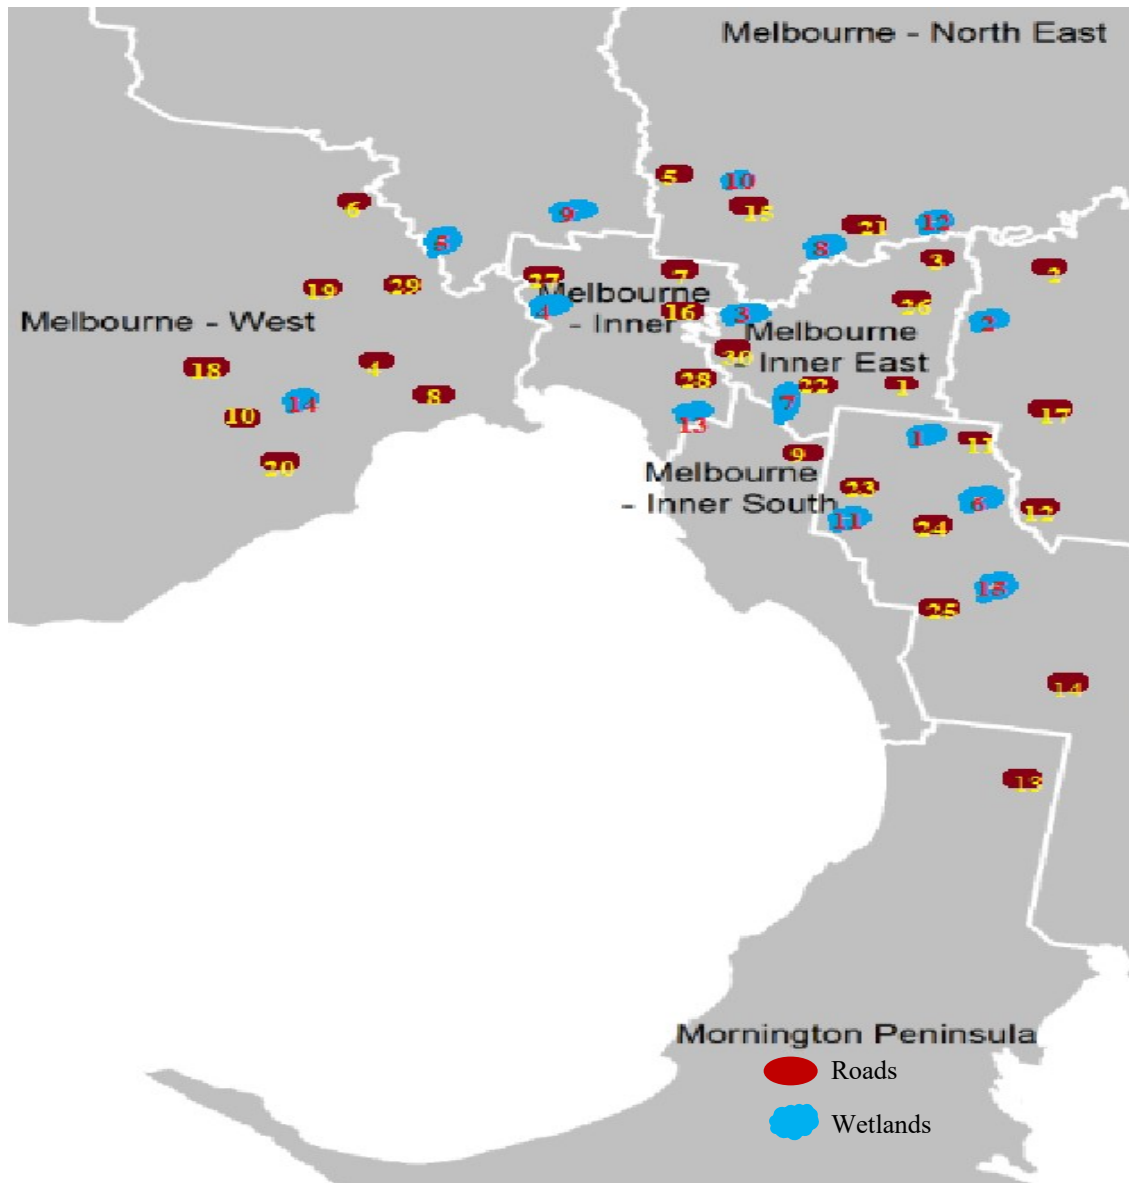

**Figure S1.** The map indicates the locations in Melbourne, Australia, where the road dust and stormwater samples were collected for various land uses, such as industrial, commercial, and residential.

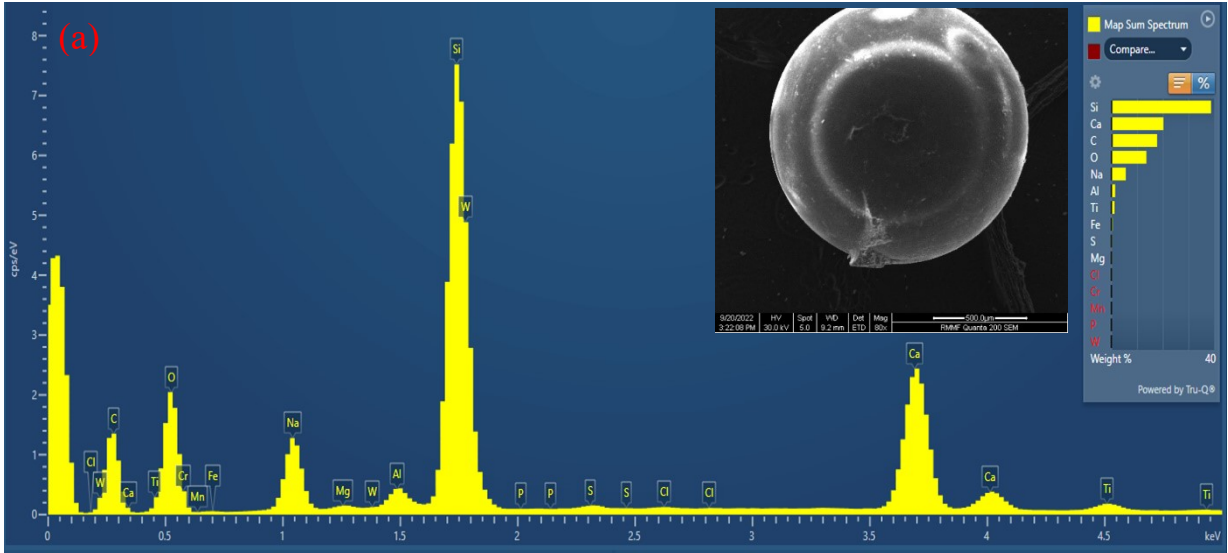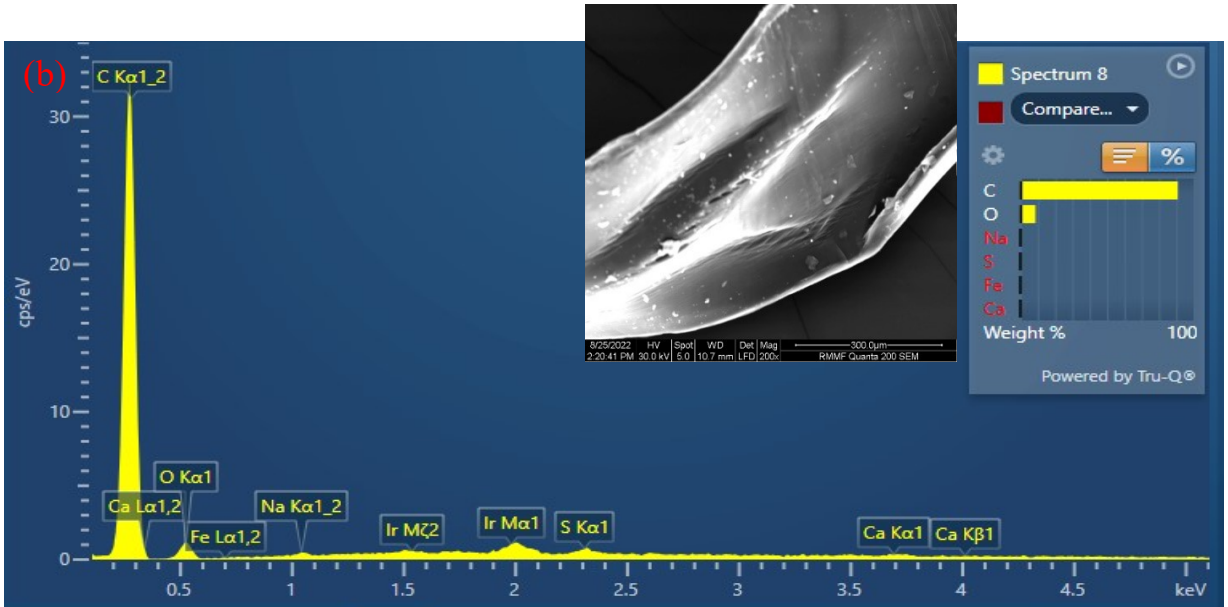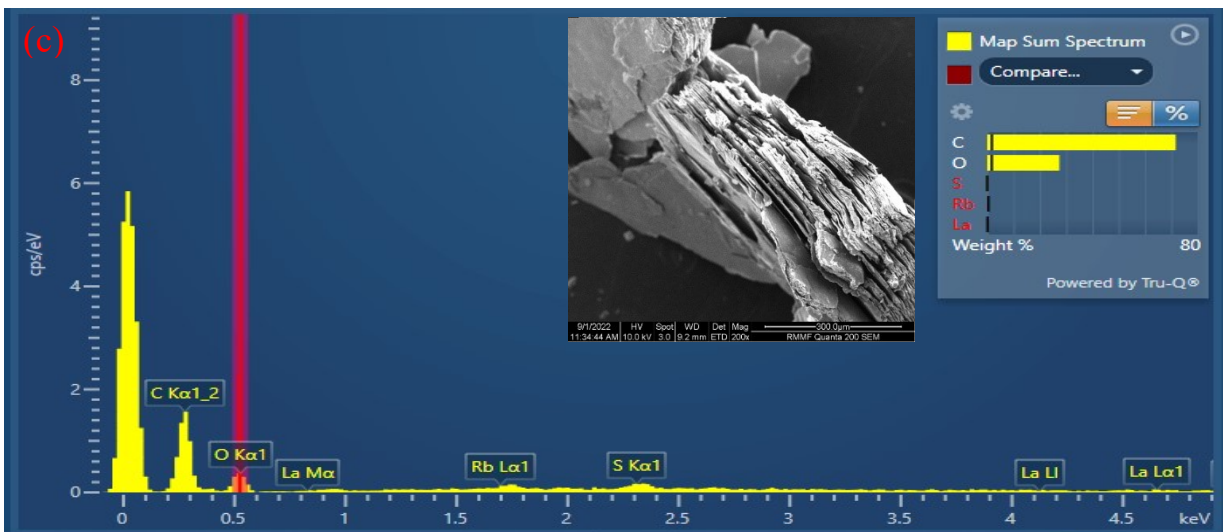

**Figure S2.** SEM images and their corresponding EDX spectra show the elemental composition of representative MPs (a) microbead, (b) fiber, and (c) film in road dust samples.

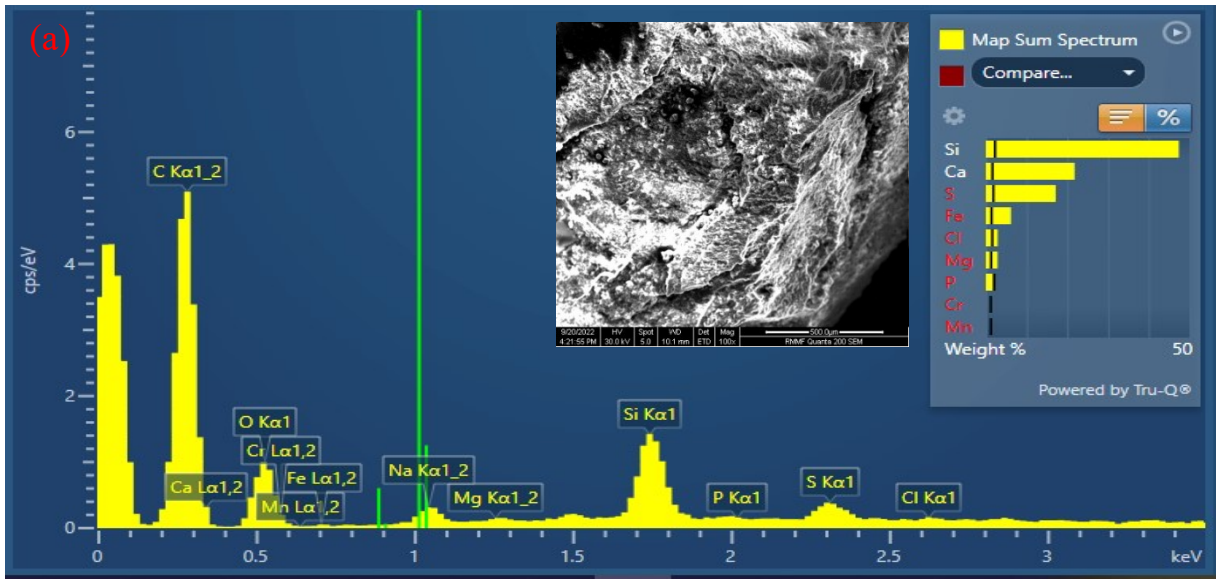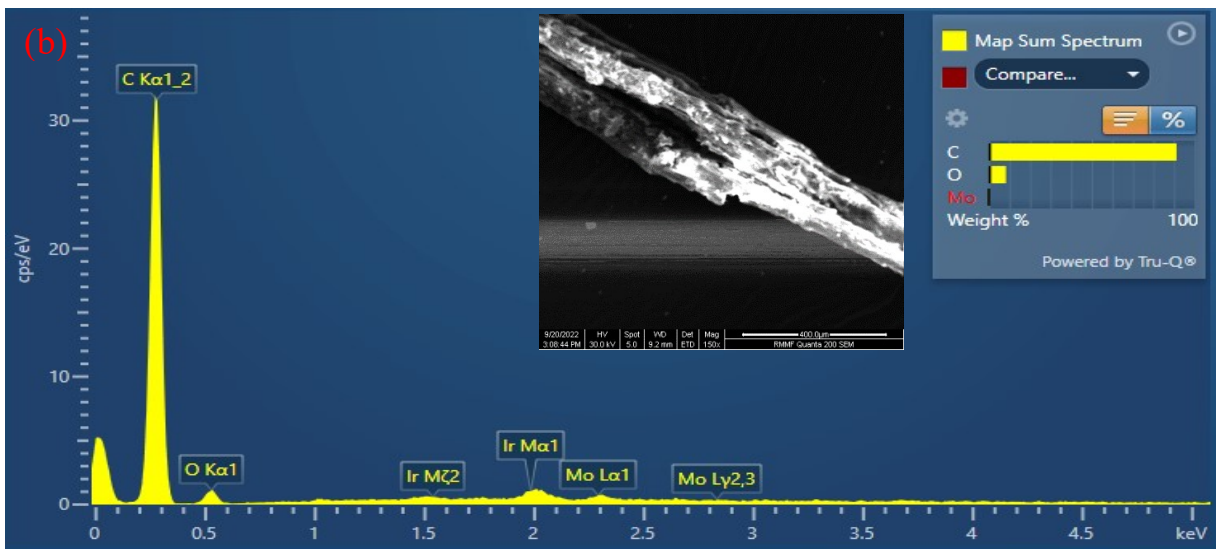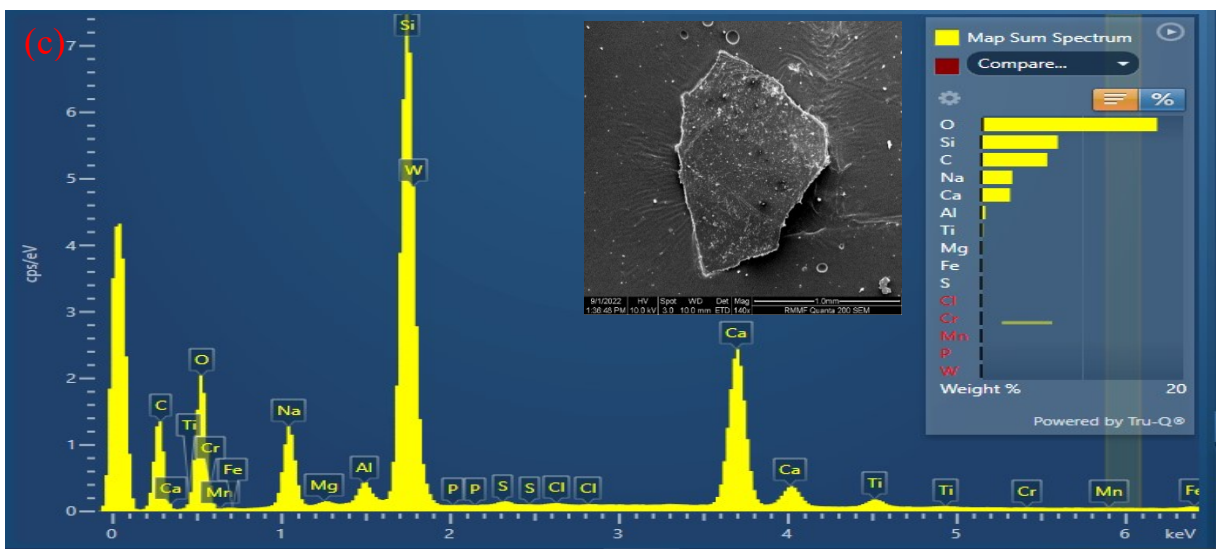

**Figure S3.** SEM images and their corresponding EDX spectra show the elemental composition of representative MPs on the (a) fragment, (b) fiber, and (c) film in stormwater runoff.

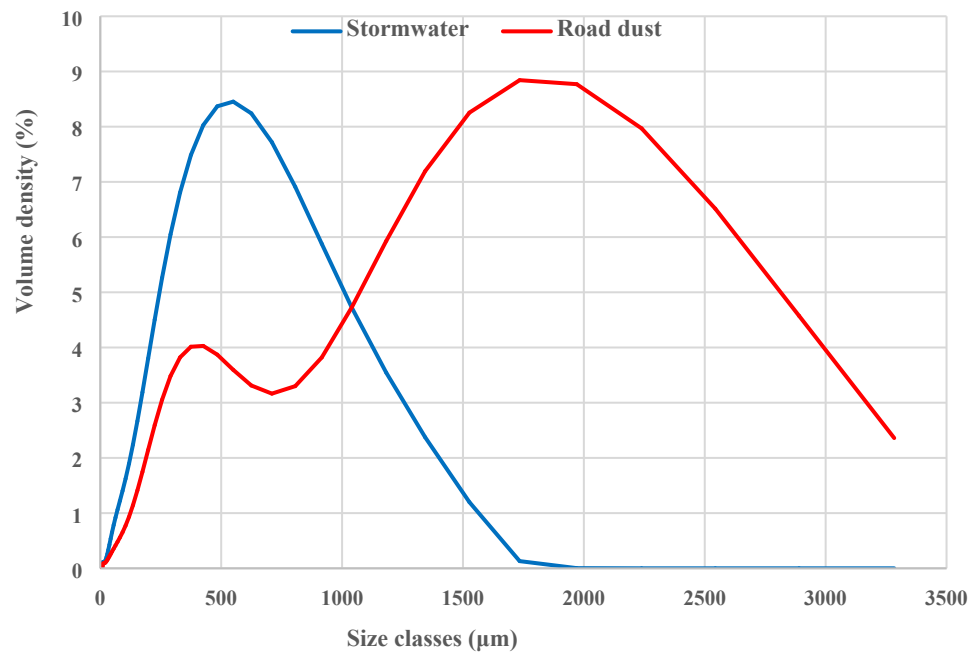

**Figure S4.** Particle size analysis of MPs identified in road dust and stormwater samples.
